# Supplementary material for: Full-length transcriptome revealed the accumulation of polyunsaturated fatty acids in developing seeds of Plukenetia volubilis
Source: PeerJ journal article supplement (doi:10.7717/peerj.13998), 2022-09-20

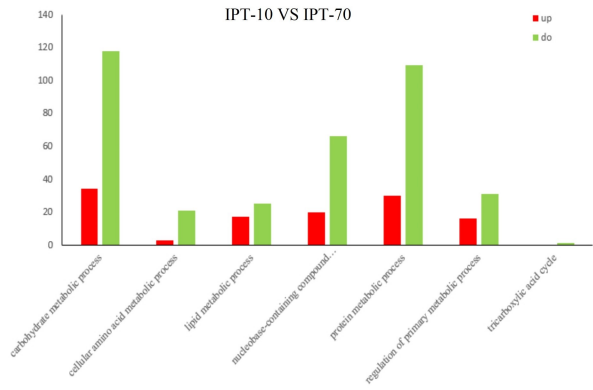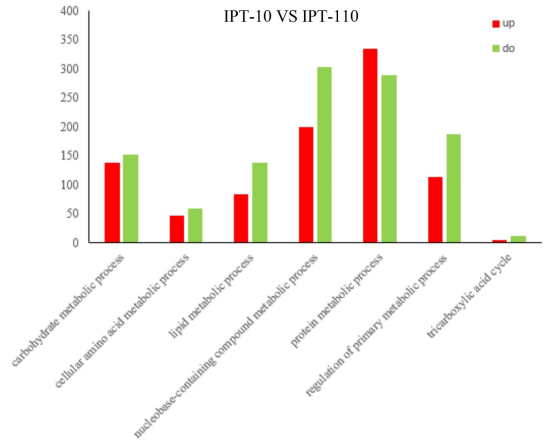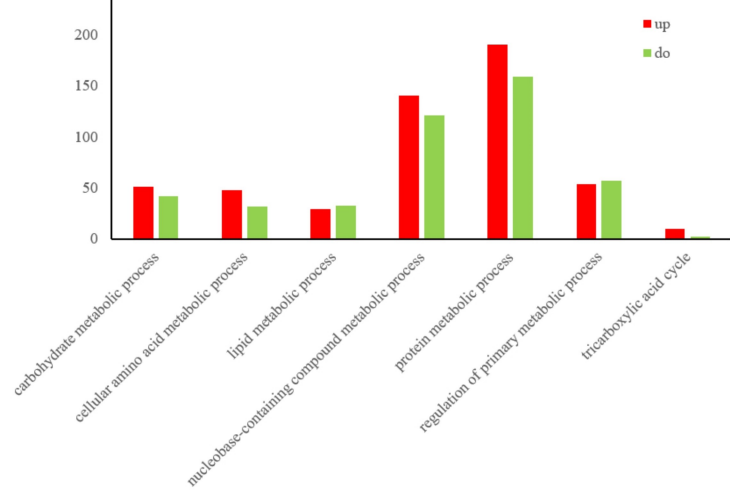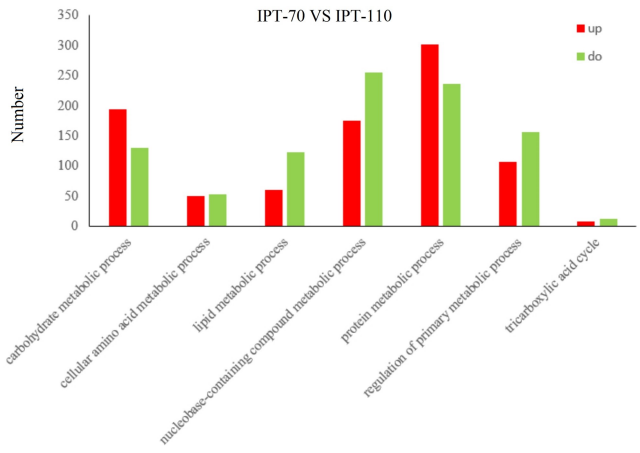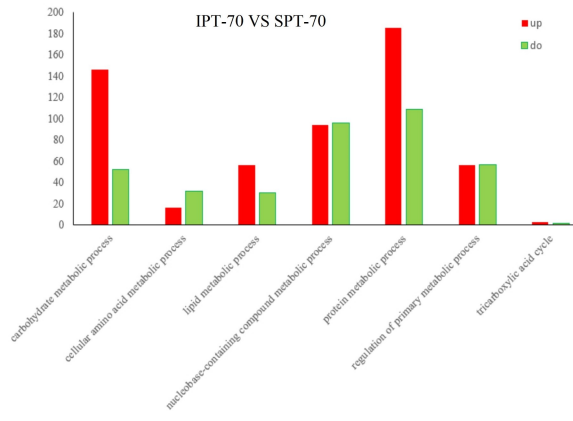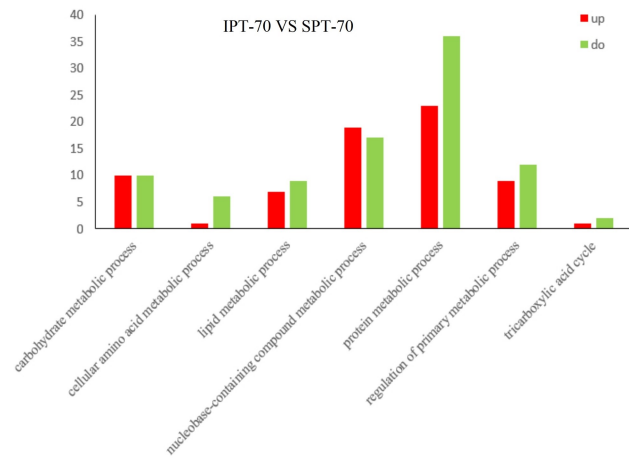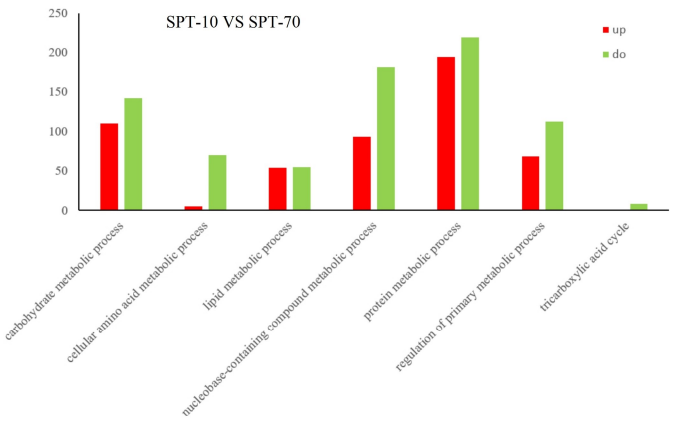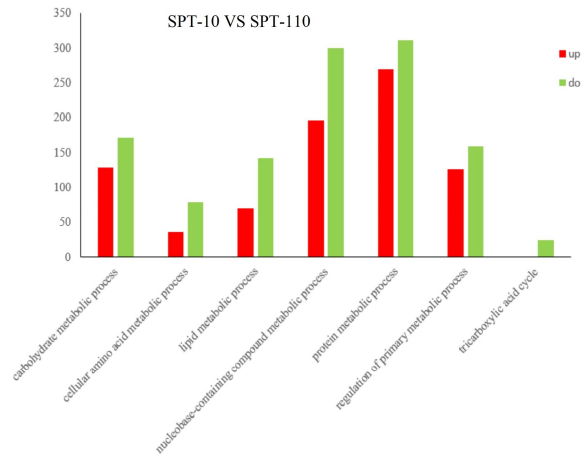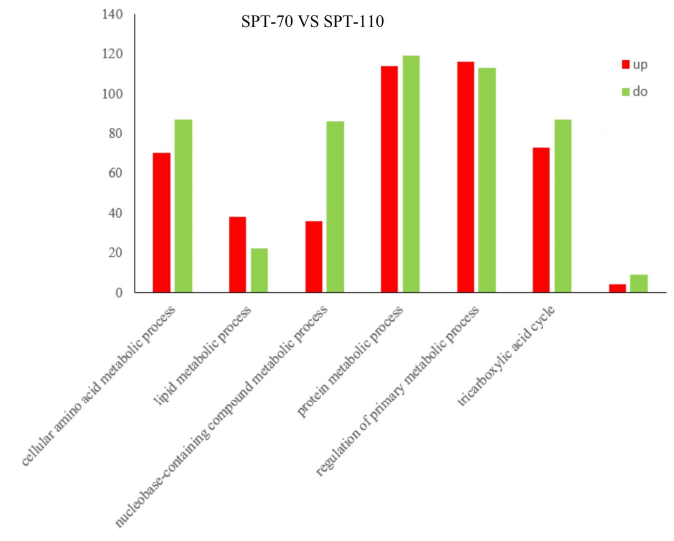

Supplement: Figure_S4.pdf [file Figure_S4.pdf]
